# Supplementary material for: A label-free electrochemical biosensor based on a bimetallic organic framework for the detection of carbohydrate antigen 19-9
Source: Royal Society of Chemistry journal article supplement (doi:10.1039/d4ay01432d), 2024-01-01
Supplement: d4ay01432d1.pdf [file d4ay01432d1.pdf]

## Supplementary Information

### A label-free electrochemical biosensor based on bimetallic organic framework for the detection of carbohydrate antigen 19-9

Tongxiao Zhao,<sup>a</sup> and Baokang Jin <sup>\*a</sup>

<sup>a</sup>Department of Chemistry, Anhui University, Hefei 230601, China.

Fig S1

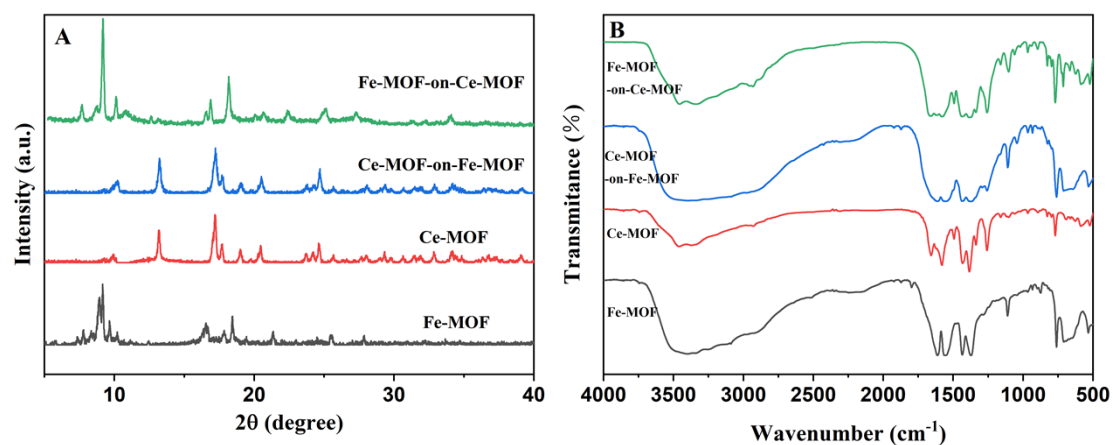

Fig. S1 (A) XRD pattern and (B) FTIR spectra of Fe-MOF, Ce-MOF, Ce-MOF-on-Fe-MOF and Fe-MOF-on-Ce-MOF.

**Fig S2**

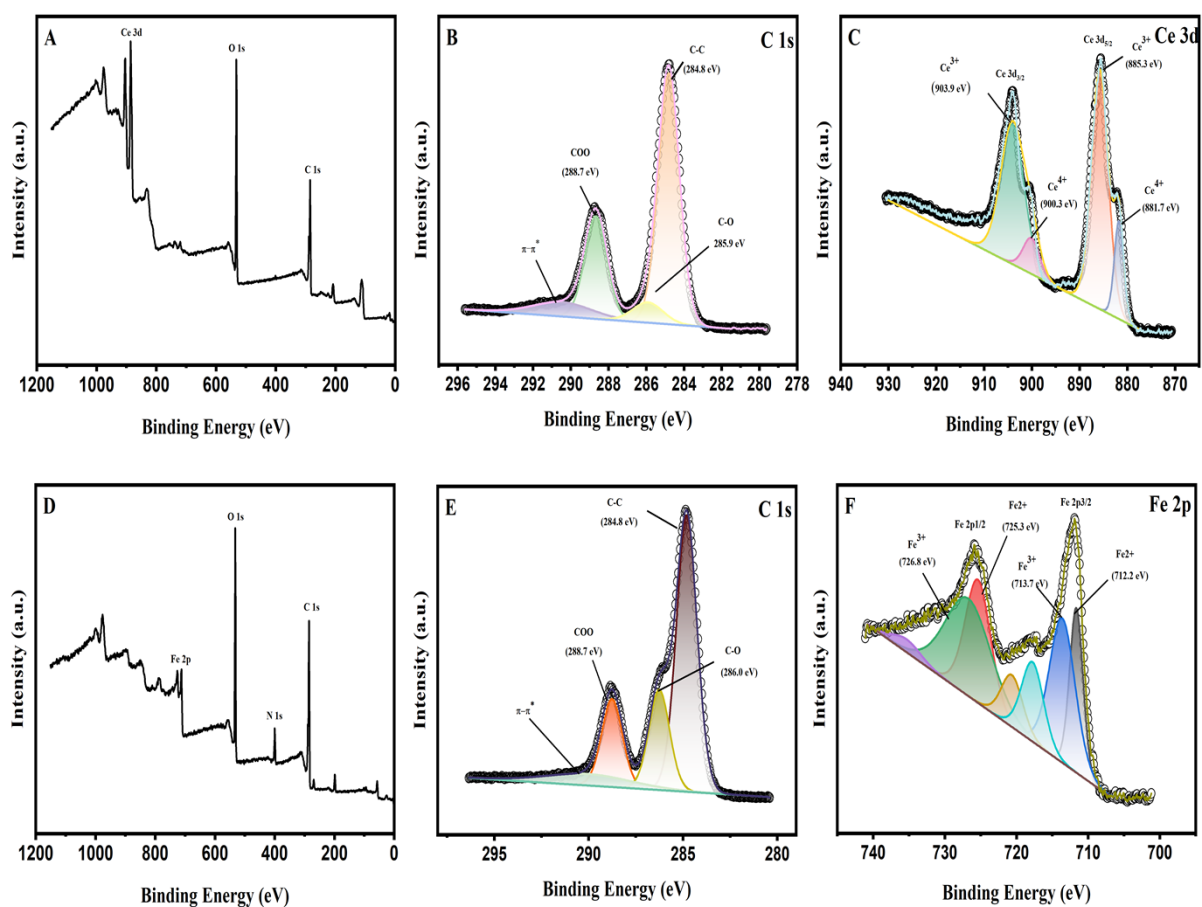

**Fig. S2 (A, B, C)** represent the full spectrum of Ce MOF, C 1s, and Ce 3d; **(D, E, F)** represent the full spectrum of Fe MOF, C 1s, and Fe 2p

**Fig S3**

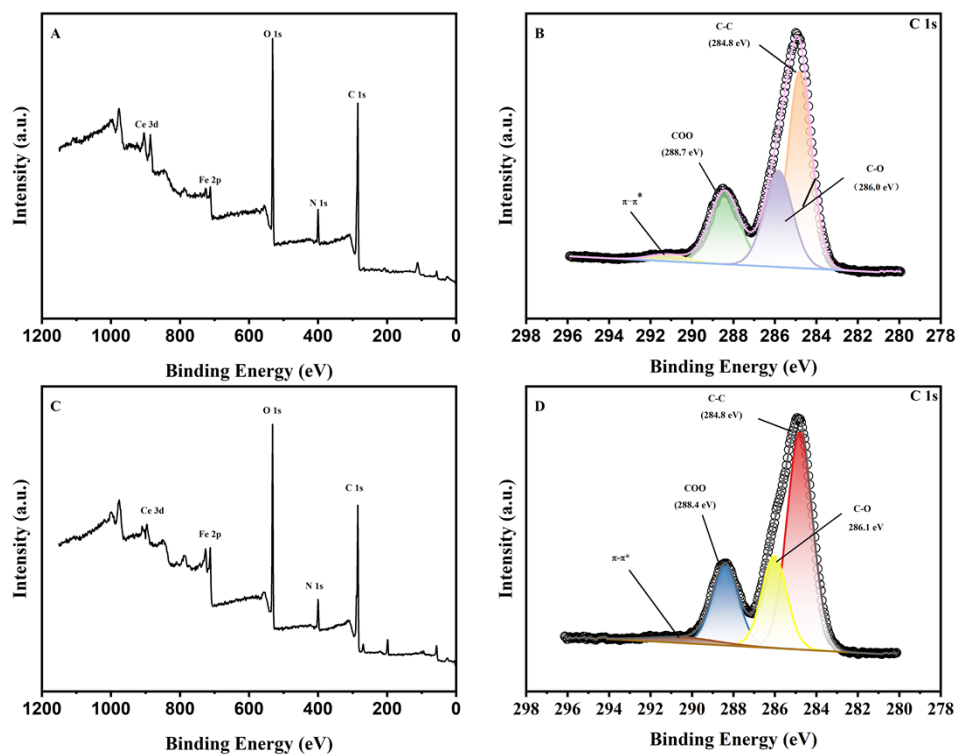

**Fig. S3 (A, B) represent the full spectrum of Ce-MOF-on-Fe-MOF, and C 1s; (C, D) represent the full spectrum of Fe-MOF-on-Ce-MOF, and Fe C 1s.**

**Fig S4**

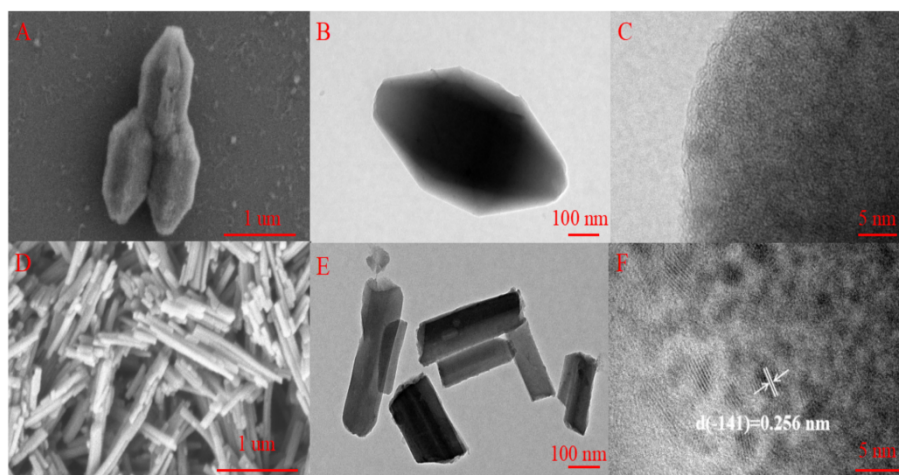

**Fig. S4 SEM, TEM and HR-TEM images of (A, B, C) Fe-MOF and (D, E, F) Ce-MOF.**

**Fig S5**

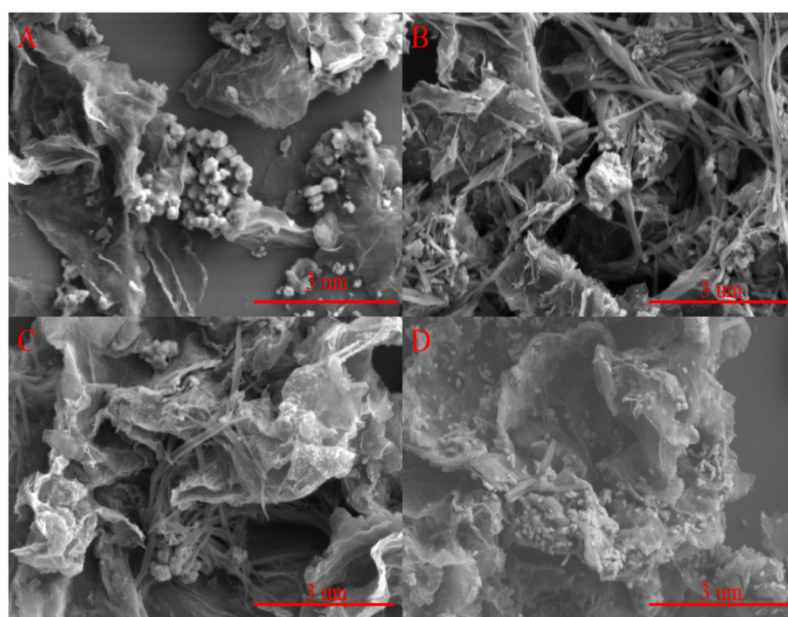

**Fig. S5 SEM of (A) rGO@Fe-MOF@Tb; (B) rGO@Ce-MOF@Tb; (C)rGO@Ce-MOF-on-Fe-MOF@Tb ; (D)rGO@Fe-MOF-on-Ce-MOF@Tb.**

Fig S6

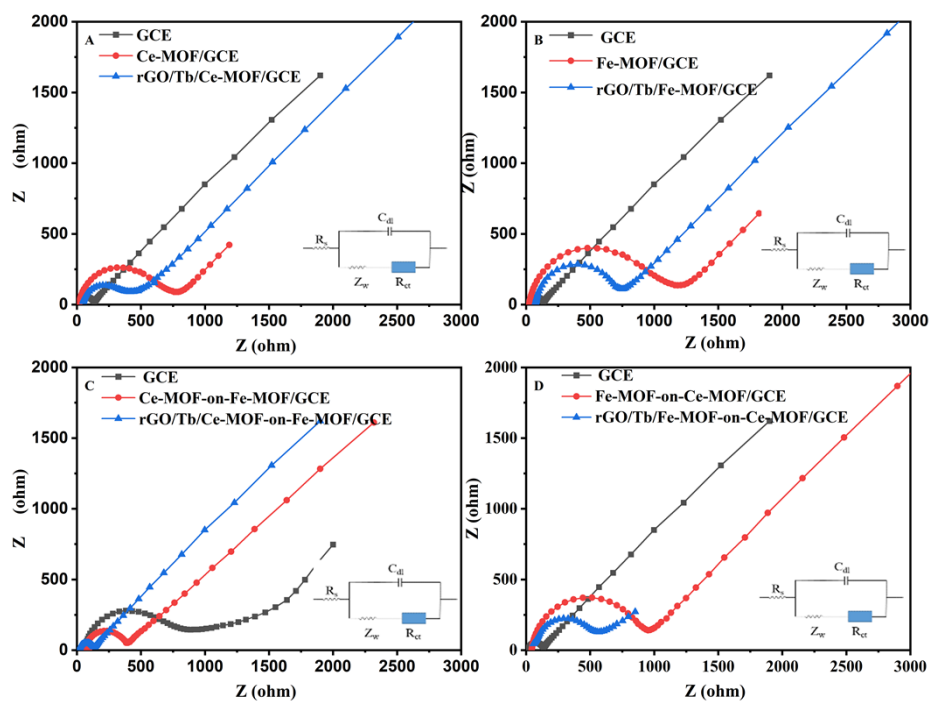

Fig. S6 EIS Nyquist plots of GCE modified by (A) Ce-MOF, (B) Fe-MOF, (C) Ce-MOF-on-Fe-MOF and (D) Fe-MOF-on-Ce-MOF in 0.01 M PBS (pH 7.4) containing 5.0 mM  $[\text{Fe}(\text{CN})_6]^{3-/4-}$  redox.

Fig S7

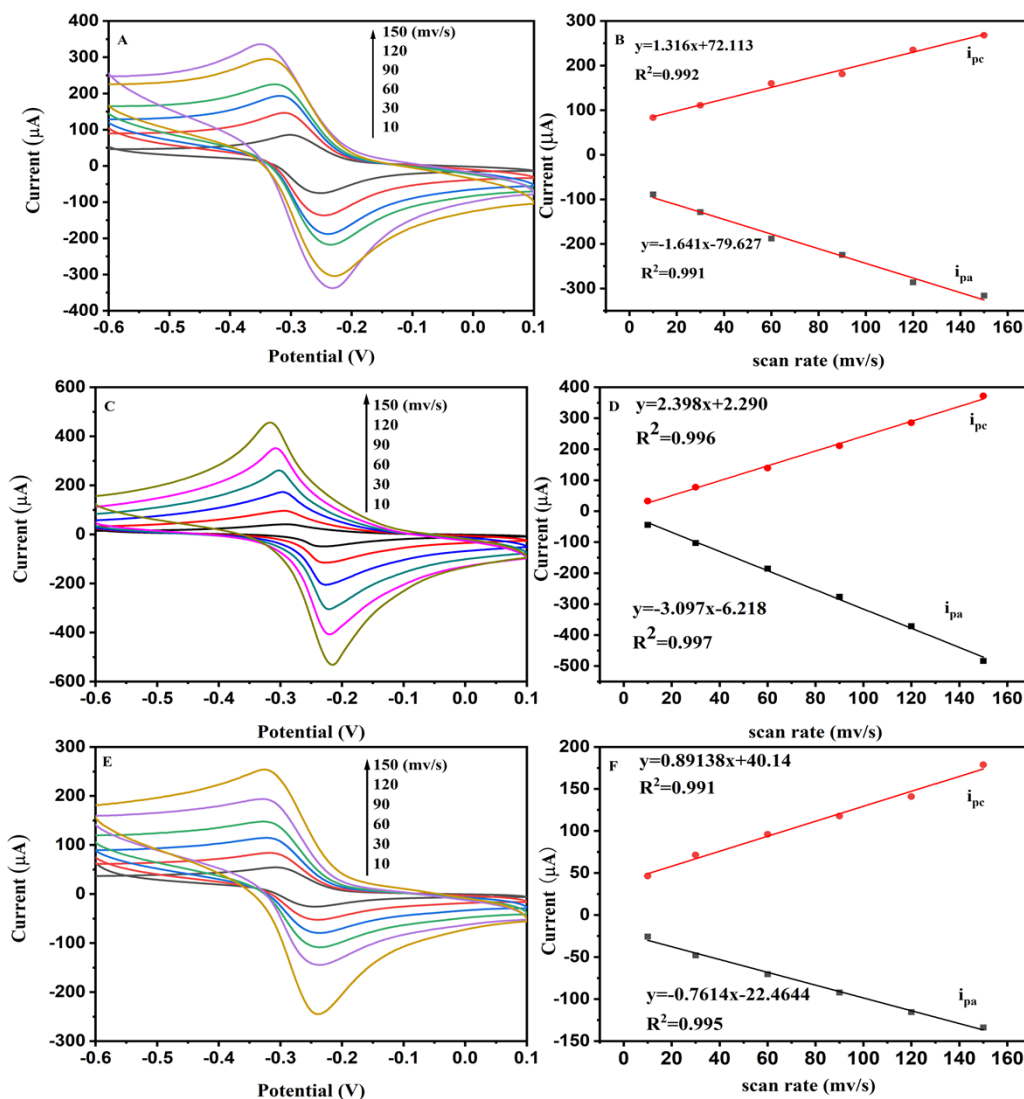

Fig. S7 CV of (A) rGO@Ce-MOF@Tb, (C) rGO@Ce-MOF-on-Fe-MOF@Tb and (E) rGO@Fe-MOF-on-Ce-MOF@Tb modified electrode at different scanning rates in 0.2 M NaCl. (D,E,F) Linear relationship between peak current and scanning rate.

Fig S8

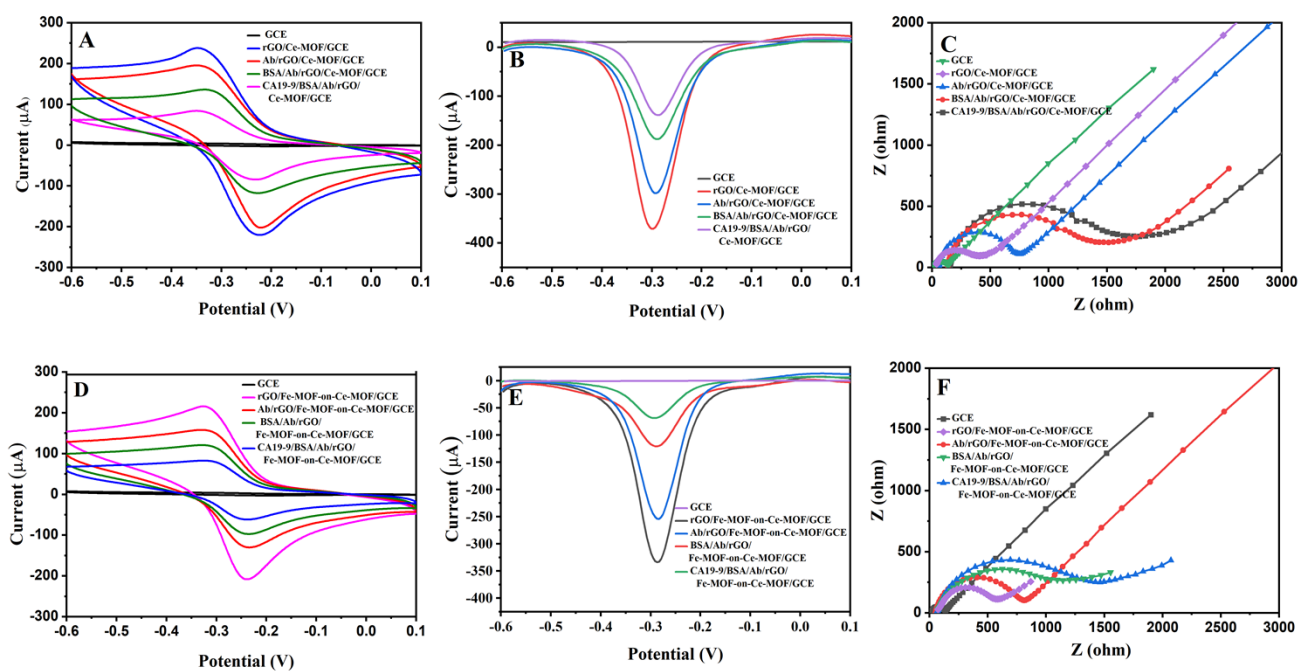

Fig. S8 (A) CV, (B) DPV and (C) EIS study for each immobilization step. CV and DPV

were obtained in 0.01 M PBS (pH=7), EIS was performed in 5.0 mM  $[\text{Fe}(\text{CN})_6]^{3-/4-}$

containing 0.01 M KCl electrolyte solution.

**Fig S9**

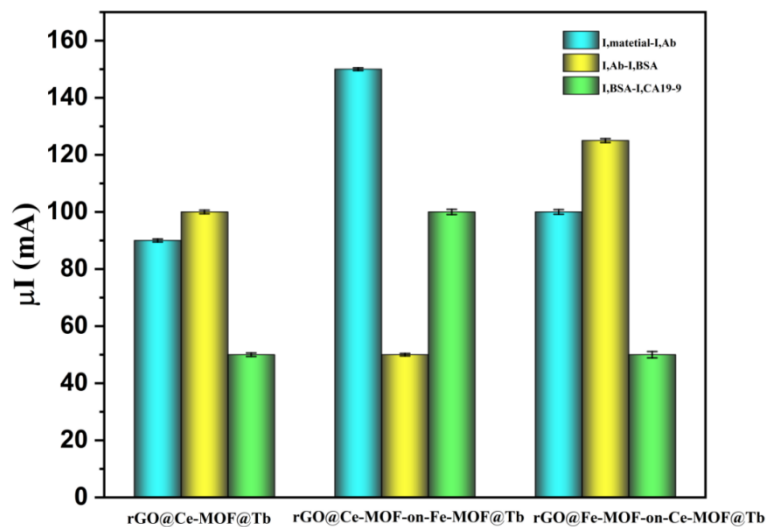

**Fig. S9** The difference in peak current values at each stage of CA-199 detection using rGO@Ce-MOF@Tb, rGO@Ce-MOF-on-Fe-MOF@Tb, rGO@Fe-MOF-on-Ce-MOF@Tb immunosensors.



**Fig S10**

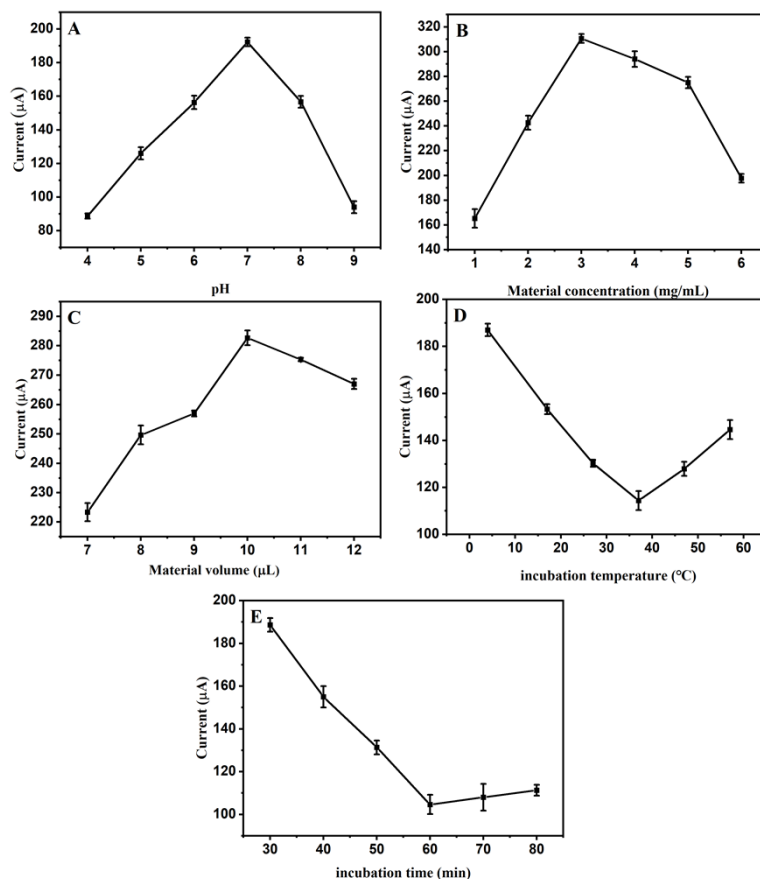

**Fig. S10** Effects of the (A) pH of PBS solution, (B) material concentration, (C) material volume, (D) incubation of CA19-9 temperature, and (E) incubation time of CA19-9.

**Table S1**

The oxidation peak current value of each step during the detection procedures of CA199 using the immunosensors based on rGO@Ce-MOF@Tb, rGO@Ce-MOF-on-Fe-MOF@Tb and rGO@Fe-MOF-on-Ce-MOF@Tb

| electrode material      | I ( $\mu\text{A}$ ) |                     |     |     |        |
|-------------------------|---------------------|---------------------|-----|-----|--------|
|                         | GCE                 | Modified electrodes | Ab  | BSA | CA19-9 |
| rGO@Ce-MOF@Tb           | 0                   | 390                 | 300 | 200 | 150    |
| rGO@Ce-MOF-on-Fe-MOF@Tb | 0                   | 400                 | 250 | 200 | 100    |
| rGO@Fe-MOF-on-Ce-MOF@Tb | 0                   | 350                 | 250 | 125 | 75     |
